# Supplementary material for: Improving adherence to colorectal cancer surveillance guidelines: results of a randomised controlled trial
Source: Springer Nature journal article supplement (doi:10.1186/s12885-017-3095-x), 2017-02-06
Supplement: MOESM1 [file 12046768]

## Baseline CATI Guide

### Personal history of bowel cancer

I will now ask about your experiences of treatment and follow up care for bowel cancer.

**1) Prior to this current diagnosis, had you ever been diagnosed with bowel cancer?**

- Yes
- No

**2) How did you come to be diagnosed with bowel cancer?**

*Record response that is closest*

- Routine screening (I had no symptoms)
- Routine diagnostic test (which I completed because I had symptoms)
- Other – please describe

---

---

**3) Was there more than one bowel cancer tumour found when you were diagnosed?**

- Yes
- No
- Don't know/Not sure

**4) Did you have surgery for bowel cancer? *If yes, what was the purpose of the surgery? (Select all that apply)***

- Did not have surgery go to 7
- To see if I definitely had cancer go to 6
- To remove the cancer/cure the cancer go to 5
- To see what stage the cancer was go to 6
- To improve the symptoms of cancer go to 6



**8) Which tests have you had? Select all that apply**

- Colonoscopy
- Sigmoidoscopy
- Faecal Occult Blood Test (FOBT) or Faecal Immunochemical Test (iFIT)

Repeat for **each** test indicated as yes:

**9) How many (insert test name) have you had?**

- 1
- 2
- 3
- 4 or more

**How long ago was the most recent test undertaken?** (*if the person has had more than one test, ask them to answer in relation to their most recent test*).

- 1 month
- 2 months
- 3 months
- 4 months
- 5 months
- 6 months
- 7 months
- 8 months
- 9 months
- 10 months
- 11 months
- 12 months
- More than 12 months but less than 2 years ago
- More than 2 years but less than 5 years ago
- More than 5 years ago



Repeat for **each** test indicated as yes:

**14) When is this test booked for?**

- Within the next month
- In 1-2 months time
- In 3-4 months time
- In more than 4 months time

Repeat for **each** test indicated as yes:

**15) What is the purpose of the test?**

- Don't know/not sure
- To see if surgery has removed all the bowel cancer
- To see if the cancer has spread
- To see if the cancer has come back
- To test whether I definitely had bowel cancer/diagnose bowel cancer

## Demographics

For this final section I would like to ask you a few questions about you and your background.

### 1) Could you tell me your age?

i) *Record response*

2) **What is the highest level of schooling you have completed?** *Read out as necessary, only code one answer.*

- University degree
- TAFE or trade certificate or diploma
- Year 12 or Higher School Certificate
- Year 10 or School Certificate
- Primary School
- Other, please specify \_\_\_\_\_
- Refused (DO NOT READ OUT)

### 3) What is your current marital status?

*Read out as necessary*

- Married
- Living in a defacto relationship
- Divorced
- Married, but separated
- Widowed
- Never married
- Refused (DO NOT READ OUT)

**4) How would you best describe your employment situation at the moment?**

*Read out as necessary*

- Employed full time
- Employed part time/casual
- Unemployed (not retired or on pension) go to 6
- Student (full time or part time) go to 6
- Retired go to 6
- Permanently unable to work/ill go to 6
- Other – Please describe go to 6
- Refused (*DO NOT READ OUT*) go to 6

**5) What is your usual occupation?**

i) *Record response*

**6) Do you have private health cover? If yes: Is that hospital, extras or package cover?**

- Yes
- No
